# Supplementary material for: miR-552 promotes ovarian cancer progression by regulating PTEN pathway
Source: J Ovarian Res. 2019 Dec 9;12:121. doi: 10.1186/s13048-019-0589-y (PMC6900846; doi:10.1186/s13048-019-0589-y)
Supplement: Supplementary file 1 — Additional file 1: Table S1. Clinicopathological features of 80 epithelial ovarian cancer patients. [file 13048_2019_589_MOESM1_ESM.docx]

**miR-552 Promotes Ovarian Cancer Progression by Regulating PTEN Pathway**

Wenman Zhao 1, #,*, Tao Han2, #, Bao Li1, #, Qianyun Ma3, Pinghua Yang4,*, Hengyu Li5,*

1Department of General surgery, Cao county people's hospital, Heze, Shandong province 274400, China

2Department of Oncology, General Hospital of Northern Theater Command. Shenyang, Liaoning Province, 110016, China.

3Department of Urology surgery, First Affiliated Hospital of Second Military Medical University, Shanghai, 200433, China

4Department of Biliary Tract Surgery, Third Affiliated Hospital of Second Military Medical University, Shanghai, 200438, China

5Department of Breast and Thyroid surgery, First Affiliated Hospital of Second Military Medical University, Shanghai, 200433, China

#These authors contribute equally to this work

**Corresponding authors.** Address: Department of Oncology, Cao county people's hospital, east of Qinghe Road, 274400 Heze, Shandong province, China. E-mail addresses: cxrmyyzwm@126.com (M. Zhao). Department of Biliary Tract Surgery, Third Affiliated Hospital of Second Military Medical University, Shanghai, 200438, China. E-mail addresses: yangpinghua2008@163.com (H. Yang). Department of Breast and Thyroid surgery, First Affiliated Hospital of Second Military Medical University, Shanghai, 200433, China. E-mail addresses: lhy@smmu.edu.cn (Y. Li).

**Running title:** miR-552 drives ovarian cancer cell expansion

**Additional file 1: Table S1. Clinicopathological features of 80 epithelial ovarian cancer patients**

| Characteristics |  |  | Total n=80 |
| --- | --- | --- | --- |
| Age(year) | ≤45 |  | 38 |
| >45 | | 42 |
| Lymph node metastasis | Absent | | 50 |
| Present | | 30 |
| Distant metastasis | Absent |  | 48 |
| Present |  | 32 |
| Histological type | Serous | | 60 |
| Non-serous | | 20 |
| Clinical stage | I-II |  | 26 |
| III-IV |  | 54 |
